# Supplementary material for: Green synthesis of zinc oxide particles with apple-derived compounds and their application as catalysts in the transesterification of methyl benzoates
Source: Royal Society of Chemistry journal article supplement (doi:10.1039/d0dt01069c), 2020-01-01
Supplement: d0dt01069c1.pdf [file d0dt01069c1.pdf]

## Supporting Information

# Green synthesis of zinc oxide particles with apple-derived compounds and their application as catalysts in the transesterification of methyl benzoates

Mohamed M.A. Soliman<sup>a,c</sup>, Elisabete C.B.A. Alegria<sup>\*a,b</sup>, Ana P.C. Ribeiro<sup>\*a</sup>, Marta M. Alves<sup>\*a</sup>, Marta S. Saraiva<sup>c,d</sup>, M. Fátima Montemor<sup>a</sup> and Armando J.L. Pombeiro<sup>a</sup>

<sup>a</sup> Centro de Química Estrutural, Instituto Superior Técnico, Universidade de Lisboa, Portugal

<sup>b</sup> Área Departamental de Engenharia Química, ISEL, Instituto Politécnico de Lisboa, Portugal

<sup>c</sup> Centro de Química e Bioquímica, Departamento de Química e Bioquímica, Faculdade de Ciências, Universidade de Lisboa, Lisboa, Portugal

<sup>d</sup> BioISI -Biosystems & Integrative Science Institute, Departamento de Química e Bioquímica, Faculdade de Ciências, Universidade de Lisboa, Campo Grande, Lisboa, Portugal

\* Correspondence: [ebastos@deq.isel.ipl.pt](mailto:ebastos@deq.isel.ipl.pt) (E.C.B.A.A.); [apribeiro@tecnico.ulisboa.pt](mailto:apribeiro@tecnico.ulisboa.pt) (A.P.C.R.); [martamalves@tecnico.ulisboa.pt](mailto:martamalves@tecnico.ulisboa.pt) (M.M.A.). Tel.: +351-21-8317-163 (E.C.B.A.A.)

$^1\text{H-NMR}$  scans were obtained using deuterated chloroform ( $\text{CDCl}_3\text{-d}_6$ ) as solvent. Chemical shifts were expressed in parts per million (ppm) relative to tetramethylsilane. NMR spectra were recorded on a Bruker Avance 400 MHz (UltraShield Plus Magnet) spectrometers using the solvent peak as internal reference ( $\text{CDCl}_3$ ;  $\delta$  H 7.26. Multiplicities are indicated as s (singlet), d (doublet), t (triplet), q (quartet). Quantifications were performed upon integration of the selected peaks of the product against peaks of the substrate at 3.9 ppm.

### Ethyl benzoylformate:

$^1\text{H NMR}$  (400 MHz,  $\text{CDCl}_3$ ):  $\delta$  1.38 (t,  $\text{CH}_3$ , 3H), 3.94 (s,  $\text{OCH}_3$ , 3H), 4.41 (q,  $\text{CH}_2$ , 2H), 7.47 (t, 2H), 7.65 (t, 1H), 8.00 (d, Ar, 2H).

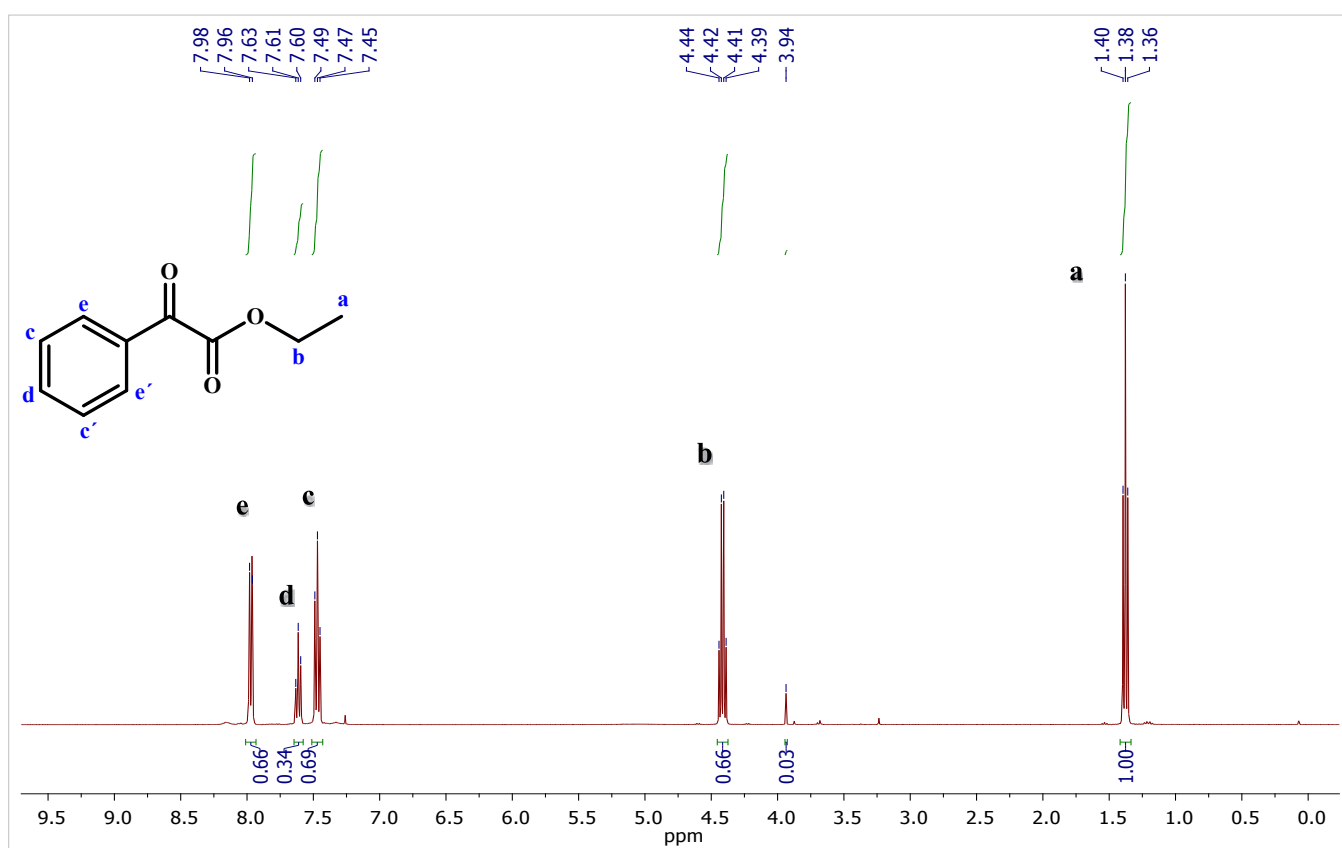

Figure S1.  $^1\text{H-NMR}$  spectrum of ethyl benzoylformate (Table 2, entry 6).

**Ethyl 4-nitrobenzoate:**

$^1\text{H}$  NMR (400 MHz,  $\text{CDCl}_3$ ):  $\delta$  1.35 (t, 3H), 3.90 (s, 3H), 4.35 (q, 2H), 8.09 (t, 2H), 8.15 (t, 1H).

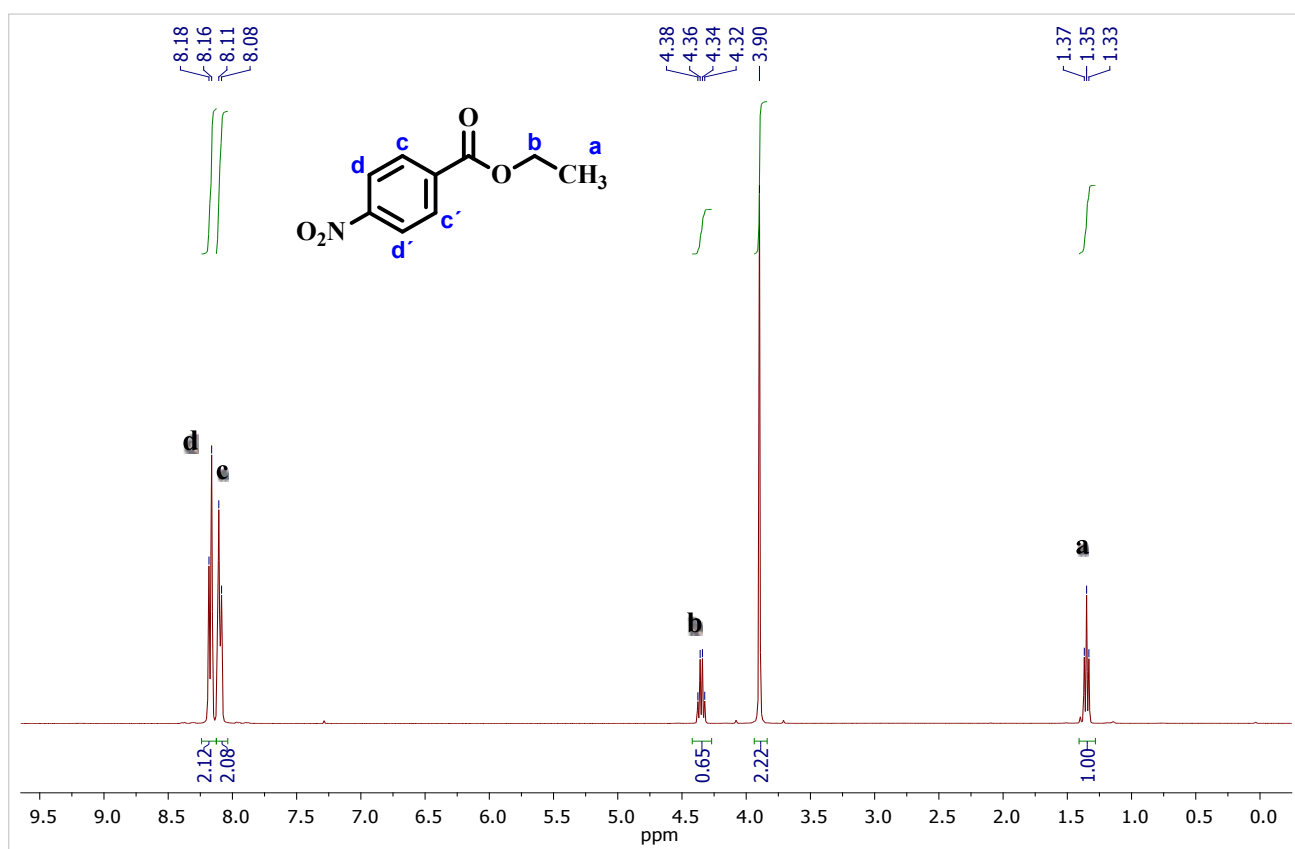

Figure S2.  $^1\text{H}$ -NMR spectrum of ethyl 4-nitrobenzoate (Table 2, entry 18).

Table S1 – Elemental analysis determined by M.M. 8.6 (2009-05-06) (A.E.) method

| Sample | N%   | C%   | H%   |
|--------|------|------|------|
| ZnONPs | 0.71 | 5.18 | <2.0 |
| ZnOq   | <0.5 | 4.35 | <2.0 |

**BET Analysis**

Various information about the textural properties could be obtained through BET analysis. The specific surface area ( $S_{\text{BET}}$ ) of the ZnO particles was determined from the nitrogen adsorption/desorption measurement applying the Brunauer-Emmett-Teller (BET) method.

The BET surface area and pore volume are presented in Table S2. The diameter of the ZnO particles can be calculated by using the following equation:

$$d_{BET} = \frac{6000}{\rho_{sample} \times S_{BET}} \quad (1)$$

where  $d_{BET}$  is the mean crystalline size (in nm),  $\rho_{sample}$  is the density of ZnO powder ( $\rho_{ZnO} = 5.60 \text{ g/cm}^3$ ) and  $S_{BET}$  is the BET specific surface area ( $\text{m}^2/\text{g}$ ). Applying Eq. (1),  $d_{BET}$  values were obtained for ZnO samples (Table S2). The BET surface area and pore volume are presented in Table (S2). The  $\text{N}_2$  adsorption-desorption isotherms for ZnO NPs, ZnOq and ZnO are displayed in Fig. (S3)

Table S2 – BET surface area, total pore volume, BJH pore diameter and mean crystalline size of ZnO samples.

| Sample | $S_{BET}$ ( $\text{m}^2/\text{g}$ ) | Total Pore Volume ( $\text{cm}^3/\text{g}$ ) | BJH pore diameter ( $\text{\AA}$ ) | $d_{BET}$ (nm) | Type |
|--------|-------------------------------------|----------------------------------------------|------------------------------------|----------------|------|
| ZnO    | 5                                   | 0.01408                                      | 180                                | 214            | II   |
| ZnONPS | 11                                  | 0.05713                                      | 279                                | 97             | II   |
| ZnOq   | 17                                  | 0.04911                                      | 177                                | 63             | II   |

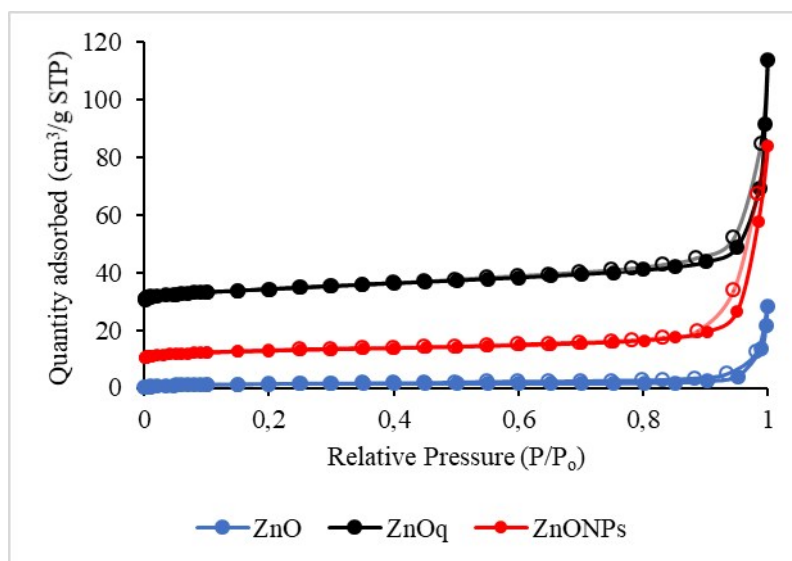

Figure S3 - N<sub>2</sub> adsorption/desorption isotherms of all the catalysts.
